# Supplementary material for: The mindful moms training: development of a mindfulness-based intervention to reduce stress and overeating during pregnancy
Source: Springer Nature journal article supplement (doi:10.1186/s12884-018-1757-6), 2018-06-01
Supplement: MOESM3 [file 15812362]

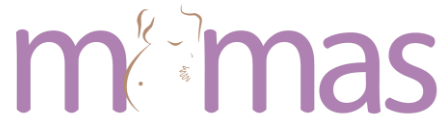

Now that you have completed the Mindful Moms program, we would like to know about your experience. Your feedback will help us to improve the classes so please answer the questions as honestly as you can. We will summarize the responses of all class members before sharing it with the teaching staff. The information that you tell us will not be linked with your name. Thank you for taking the time to complete the evaluation.

1. How many Mindful Moms classes have you attended? \_\_\_\_\_
  
2. How convenient is the class location?  
 Very convenient       Somewhat convenient       Not at all convenient
  
3. How convenient is the day and time of the class?  
 Very convenient       Somewhat convenient       Not at all convenient
  
4. Did you have enough opportunities to ask questions of the teachers during or after class?  
 Yes       No       Not applicable; I did not have any questions.
  
5. What is the main reason you enrolled in the program? \_\_\_\_\_  
\_\_\_\_\_
  
6. How satisfied are you with the program so far?  
 Very satisfied     Satisfied     Dissatisfied     Very dissatisfied
  
7. Please list two things you like about the program.  
1. \_\_\_\_\_  
2. \_\_\_\_\_
  
8. Please list two things you dislike about the program.  
1. \_\_\_\_\_  
2. \_\_\_\_\_
  
9. If there was one thing you could change about the program, what would it be? \_\_\_\_\_  
\_\_\_\_\_  
\_\_\_\_\_  
\_\_\_\_\_

10. How useful was learning to meditate, or do Mindful Awareness of Breathing?

Very useful       Useful       Not very useful       Not at all useful

a. How often have you used this tool over the past week?

Did not use       A few times       Once a day on most days       Several times on most days

b. Comments: \_\_\_\_\_

11. How useful was learning Mindful Movement – in other words, mindful walking or yoga?

Very useful       Useful       Not very useful       Not at all useful

a. How often have you used this tool over the past week?

Did not use       A few times       Once a day on most days       Several times on most days

b. Comments: \_\_\_\_\_

12. How useful was learning Mindful Eating?

Very useful       Useful       Not very useful       Not at all useful

a. How often have you used this tool over the past week?

Did not use       A few times       Once a day on most days       Several times on most days

b. Comments: \_\_\_\_\_

13. How useful was the eating and movement advice for outside of class (like, the three basic commitments and tips for eating healthy and movement)?

Very useful       Useful       Not very useful       Not at all useful

a. Comments: \_\_\_\_\_

In your own words, please explain what mindfulness is.

\_\_\_\_\_  
\_\_\_\_\_  
\_\_\_\_\_

14. How well would you say you understand the idea of acceptance?

Very well       Somewhat well       A little       Not at all

15. Have you used any of the skills you learned in Mindful Moms outside of class?

No

Yes. Please tell us which skill you used and how you used it: \_\_\_\_\_

\_\_\_\_\_  
\_\_\_\_\_

16. On average, how much time outside of class have you spent practicing these new skills each week?

\_\_\_\_\_ minutes or hours

(Please circle one)

17. Is there anything else you would like to tell us about your experience so far?

\_\_\_\_\_  
\_\_\_\_\_  
\_\_\_\_\_  
\_\_\_\_\_
